# Supplementary material
Source: Elsevier journal article supplement (https://comptes-rendus.academie-sciences.fr/geoscience/article/10.1016/j.crte.2010.11.003/file/attach/mmc1.pdf)
Supplement: mmc1 [file mmc1.pdf]

| site   | x         | y          | n  | lithology  | MAGNETIC PARAMETERS FROM REPRESENTATIVE SAMPLE FROM EACH SITE |       |       |       |        |           |             |                |                  |        | MAGNETIC PARAMETERS FROM ASM SITE |       |       |       |       |       |       |        |       |   |
|--------|-----------|------------|----|------------|---------------------------------------------------------------|-------|-------|-------|--------|-----------|-------------|----------------|------------------|--------|-----------------------------------|-------|-------|-------|-------|-------|-------|--------|-------|---|
|        |           |            |    |            | Km                                                            | L     | F     | P'    | T      | % paramag | $\chi_{fr}$ | paramag equiv. | ferromag. equiv. | Km     | (SI)                              | s     | L     | s     | F     | S     | P'    | S      | T     | S |
| AN-01  | 679205,89 | 4732987,04 | 15 | e-level    | 270,9                                                         | 1,008 | 1,021 | 1,028 | 0,420  | 22,0      | 9,6         | 59,5           | 211,4            | 209,90 | 37,00                             | 1,008 | 0,004 | 1,021 | 0,010 | 1,083 | 0,014 | 0,420  | 0,268 |   |
| AN-02A | 678952,99 | 4733917,09 | 17 | sandstone  | 375,6                                                         | 1,013 | 1,018 | 1,031 | 0,129  | 85,0      | 12,7        | 319,3          | 56,3             | 293,00 | 60,26                             | 1,013 | 0,005 | 1,018 | 0,008 | 1,030 | 0,013 | 0,129  | 0,286 |   |
| AN-02B | 678952,99 | 4733917,09 | 21 | e-level    | 226,2                                                         | 1,014 | 1,022 | 1,037 | 0,217  | 80,0      | 12,7        | 300,5          | 75,1             | 226,2  | 15,00                             | 1,015 | 0,003 | 1,022 | 0,006 | 1,035 | 0,012 | 0,225  | 0,205 |   |
| AN-03  | 679706,63 | 4732235,73 | 15 | e-level    | 146,9                                                         | 1,014 | 1,018 | 1,032 | 0,092  | 0,0       | 14,7        | 0,0            | 147,4            | 191,60 | 44,70                             | 1,037 | 0,007 | 1,074 | 0,024 | 1,116 | 0,020 | 0,293  | 0,229 |   |
| AN-04  | 680842,54 | 4731422,55 | 16 | e-level    | 376,2                                                         | 1,026 | 1,007 | 1,036 | -0,541 | 24,5      | 10,0        | 92,0           | 284,2            | 352,11 | 39,63                             | 1,026 | 0,006 | 1,007 | 0,006 | 1,035 | 0,007 | -0,541 | 0,256 |   |
| AR-01  | 701624,88 | 4720261,11 | 15 | sandstone  | 89,27                                                         | 1,009 | 1,022 | 1,033 | 0,372  | 64,1      | 4,1         | 57,2           | 32,1             | 91,23  | 4,89                              | 1,009 | 0,002 | 1,021 | 0,006 | 1,032 | 0,005 | 0,372  | 0,205 |   |
| AR-02  | 701683,17 | 4718876,72 | 15 | sandstone  | 144,3                                                         | 1,003 | 1,007 | 1,010 | 0,390  | 81,7      | 1,6         | 117,9          | 26,4             | 159,20 | 38,90                             | 1,002 | 0,002 | 1,006 | 0,003 | 1,009 | 0,004 | 0,429  | 0,359 |   |
| AR-03  | 699454,52 | 4725539,68 | 15 | sandstone  | 124,5                                                         | 1,005 | 1,010 | 1,015 | 0,185  | 75,0      | 2,9         | 93,3           | 31,2             | 102,81 | 11,77                             | 1,004 | 0,002 | 1,009 | 0,007 | 1,014 | 0,007 | 0,185  | 0,403 |   |
| AR-04  | 702701,44 | 4728874,93 | 13 | e-level    | 252,3                                                         | 1,061 | 1,021 | 1,087 | -0,460 | 13,5      | 11,5        | 34,0           | 218,3            | 246,85 | 9,07                              | 1,061 | 0,015 | 1,021 | 0,009 | 1,087 | 0,013 | -0,460 | 0,227 |   |
| AR-04b | 702701,44 | 4728874,93 | 17 | sandstone  | 180                                                           | 1,004 | 1,006 | 1,011 | 0,150  | 85,0      | 3,0         | 153,0          | 27,0             | 179,00 | 7,50                              | 1,004 | 0,001 | 1,007 | 0,003 | 1,010 | 0,005 | 0,250  | 0,175 |   |
| AR-05  | 702045,24 | 4727464,94 | 15 | sandstone  | 108,3                                                         | 1,004 | 1,010 | 1,015 | 0,344  | 76,7      | 3,0         | 83,0           | 25,3             | 105,44 | 11,19                             | 1,004 | 0,002 | 1,010 | 0,004 | 1,015 | 0,003 | 0,344  | 0,327 |   |
| AR-08  | 701110,76 | 4723255,38 | 15 | sandstone  | 73,5                                                          | 1,003 | 1,008 | 1,012 | 0,370  | 70,6      | 0,9         | 51,9           | 21,6             | 71,62  | 3,51                              | 1,003 | 0,001 | 1,008 | 0,004 | 1,012 | 0,004 | 0,370  | 0,297 |   |
| B-01   | 679835,73 | 4722847,95 | 15 | sandstone  | 84,9                                                          | 1,004 | 1,007 | 1,011 | 0,135  | 54,3      | 4,5         | 46,1           | 38,8             | 72,84  | 6,62                              | 1,004 | 0,002 | 1,005 | 0,003 | 1,009 | 0,004 | 0,099  | 0,349 |   |
| B-03   | 679835,73 | 4722847,95 | 18 | sandstone  | 84,9                                                          | 1,004 | 1,007 | 1,011 | 0,135  | 54,3      | 4,5         | 46,1           | 38,8             | 85,07  | 8,38                              | 1,004 | 0,003 | 1,009 | 0,010 | 1,013 | 0,015 | 0,165  | 0,388 |   |
| BI-02  | 679282    | 4722214,97 | 11 | e-level    | 118,8                                                         | 1,015 | 1,031 | 1,047 | 0,338  | 78,7      | 2,0         | 93,5           | 25,3             | 131,56 | 15,98                             | 1,015 | 0,004 | 1,031 | 0,004 | 1,047 | 0,007 | 0,338  | 0,128 |   |
| BI-03  | 679572,96 | 4722675,23 | 19 | sandstone  | 143,9                                                         | 1,006 | 1,008 | 1,015 | 0,214  | 76,5      | 1,4         | 110,1          | 33,8             | 147,40 | 26,26                             | 1,006 | 0,005 | 1,008 | 0,004 | 1,015 | 0,006 | 0,214  | 0,464 |   |
| BT-01  | 685498,59 | 4740669,57 | 15 | e-level    | 333,1                                                         | 1,039 | 1,123 | 1,175 | 0,532  | 11,0      | 14,0        | 36,6           | 296,5            | 324,96 | 25,88                             | 1,039 | 0,021 | 1,123 | 0,024 | 1,175 | 0,041 | 0,531  | 0,171 |   |
| CA-05  | 702589,17 | 4730359,16 | 19 | sandstone  | 199,6                                                         | 1,043 | 1,020 | 1,061 | -0,477 | 199,6     | 10,3        | 25,7           | 173,9            | 242,30 | 36,59                             | 1,042 | 0,014 | 1,019 | 0,018 | 1,061 | 0,029 | -0,477 | 0,325 |   |
| CA-06  | 701130,9  | 4721143,18 | 16 | e-level    | 63,12                                                         | 0,961 | 1,035 | 1,048 | 0,531  | 89,4      | 1,6         | 56,4           | 6,7              | 65,10  | 1,48                              | 1,011 | 0,002 | 1,035 | 0,001 | 1,040 | 0,003 | 0,531  | 0,115 |   |
| DI-01  | 684217,17 | 4732278,35 | 19 | e-level    | 151,7                                                         | 1,013 | 1,031 | 1,046 | 0,404  | 51,0      | 5,3         | 77,4           | 74,3             | 192,98 | 5,92                              | 1,011 | 0,001 | 1,039 | 0,003 | 1,053 | 0,003 | 0,522  | 0,045 |   |
| EC-05  | 686356,91 | 4719179,7  | 28 | sandstone  | 129                                                           | 1,006 | 1,011 | 1,018 | 0,083  | 80,0      | 1,9         | 103,2          | 25,8             | 125,46 | 14,34                             | 1,008 | 0,004 | 1,018 | 0,012 | 1,028 | 0,015 | 0,221  | 0,271 |   |
| EC-06  | 686669,04 | 4720135,6  | 19 | sandstone  | 135,9                                                         | 1,009 | 1,018 | 1,028 | 0,221  | 65,6      | 2,9         | 89,2           | 46,7             | 62,39  | 15,55                             | 1,005 | 0,002 | 1,011 | 0,015 | 1,018 | 0,017 | 0,083  | 0,429 |   |
| EC-07  | 686525,14 | 4720767,51 | 22 | sandstone  | 92,62                                                         | 1,013 | 1,021 | 1,035 | 0,103  | 92,1      | 0,7         | 85,3           | 7,3              | 80,68  | 14,58                             | 1,013 | 0,005 | 1,020 | 0,014 | 1,035 | 0,019 | 0,103  | 0,290 |   |
| EC-08  | 686815,21 | 4722227,49 | 23 | e-level    | 81,26                                                         | 1,015 | 1,057 | 1,077 | 0,572  | 89,5      | 0,8         | 72,8           | 8,5              | 80,28  | 4,43                              | 1,015 | 0,003 | 1,057 | 0,009 | 1,077 | 0,009 | 0,572  | 0,107 |   |
| EC-09  | 686341,46 | 4723991,19 | 20 | e-level    | 99,27                                                         | 1,026 | 1,116 | 1,155 | 0,609  | 75,7      | 0,7         | 75,2           | 24,1             | 99,46  | 4,29                              | 1,026 | 0,006 | 1,115 | 0,019 | 1,155 | 0,020 | 0,609  | 0,109 |   |
| EC-10  | 686127,88 | 4725982,61 | 29 | sandstone  | 116,4                                                         | 1,008 | 1,025 | 1,035 | 0,369  | 78,5      | 2,5         | 91,4           | 25,0             | 114,78 | 17,23                             | 1,008 | 0,003 | 1,025 | 0,017 | 1,035 | 0,019 | 0,369  | 0,456 |   |
| EC-10b | 686127,88 | 4725982,61 | 23 | e-level    | 101,3                                                         | 1,014 | 1,049 | 1,067 | 0,557  | 83,0      | 1,8         | 84,1           | 17,2             | 112,30 | 12,20                             | 1,006 | 0,004 | 1,015 | 0,014 | 1,021 | 0,005 | 0,275  | 0,250 |   |
| EC-11  | 685991,45 | 4727266,08 | 22 | sandstone  | 153,4                                                         | 1,005 | 1,008 | 1,013 | 0,255  | 67,2      | 3,1         | 103,0          | 50,4             | 131,60 | 26,12                             | 1,005 | 0,002 | 1,008 | 0,002 | 1,013 | 0,003 | 0,254  | 0,304 |   |
| ES-03  | 665041,53 | 4733539,29 | 19 | e-level    | 13,27                                                         | 1,005 | 1,006 | 1,011 | 0,143  | 27,7      | 5,0         | 3,7            | 9,6              | 19,58  | 4,88                              | 1,005 | 0,004 | 1,006 | 0,002 | 1,011 | 0,005 | 0,143  | 0,418 |   |
| ES-04  | 665738,43 | 4735017,37 | 14 | e-level    | 351,5                                                         | 1,012 | 1,021 | 1,035 | 0,174  | 11,7      | 10,5        | 41,2           | 310,3            | 294,35 | 73,11                             | 1,012 | 0,005 | 1,021 | 0,013 | 1,034 | 0,014 | 0,174  | 0,416 |   |
| ES-04b | 665738,43 | 4735017,37 | 19 | e-level    | 239,3                                                         | 1,008 | 1,009 | 1,017 | 0,03   | 85,0      | 5,0         | 203,4          | 35,9             | 242,10 | 28,40                             | 1,007 | 0,003 | 1,008 | 0,006 | 1,018 | 0,003 | 0,151  | 0,023 |   |
| ES-05  | 666615,37 | 4736506,45 | 21 | sandstone  | 142,6                                                         | 1,012 | 1,014 | 1,026 | 0,045  | 62,8      | 13,8        | 89,5           | 53,1             | 137,60 | 16,03                             | 1,012 | 0,003 | 1,013 | 0,005 | 1,025 | 0,006 | 0,045  | 0,218 |   |
| ES-06  | 666522,32 | 4737749,61 | 14 | e-level    | 85,72                                                         | 1,009 | 1,031 | 1,042 | 0,563  | 84,0      | 9,3         | 72,0           | 13,7             | 94,03  | 16,19                             | 1,008 | 0,003 | 1,031 | 0,007 | 1,042 | 0,010 | 0,563  | 0,139 |   |
| ES-06  | 666522,32 | 4737749,61 | 14 | e-level    | 85,72                                                         | 1,009 | 1,031 | 1,042 | 0,563  | 18,0      | 9,3         | 15,4           | 70,3             | 94,03  | 16,19                             | 1,008 | 0,003 | 1,031 | 0,007 | 1,042 | 0,010 | 0,563  | 0,139 |   |
| ES-10  | 667304,73 | 4742294,17 | 24 | sandstone  | 118,3                                                         | 1,014 | 1,016 | 1,032 | 0,058  | 53,5      | 6,3         | 63,3           | 55,0             | 114,66 | 8,90                              | 1,013 | 0,012 | 1,016 | 0,013 | 1,032 | 0,017 | 0,058  | 0,505 |   |
| ES-11  | 667676,69 | 4743159,28 | 22 | sandstones | 127,3                                                         | 1,009 | 1,017 | 1,027 | 0,288  | 48,4      | 7,0         | 61,6           | 65,7             | 128,54 | 11,41                             | 1,009 | 0,006 | 1,017 | 0,007 | 1,027 | 0,008 | 0,288  | 0,370 |   |
| ES-12  | 662929,08 | 4723938,45 | 16 | sandstone  | 152,4                                                         | 1,019 | 1,027 | 1,049 | 0,094  | 38,0      | 7,0         | 57,9           | 94,5             | 145,68 | 24,48                             | 1,018 | 0,009 | 1,027 | 0,015 | 1,049 | 0,012 | 0,094  | 0,433 |   |
| ES-13  | 668218,17 | 4744667,16 | 24 | e-level    | 326,8                                                         | 1,027 | 1,040 | 1,068 | 0,209  | 19,4      | 10,5        | 63,4           | 263,4            | 325,37 | 31,37                             | 1,027 | 0,010 | 1,040 | 0,006 | 1,068 | 0,008 | 0,209  | 0,225 |   |
| ES-14  | 668886,31 | 4746004,86 | 18 | sandstone  | 254,6                                                         | 1,018 | 1,027 | 1,046 | 0,150  | 21,3      | 9,3         | 54,2           | 200,4            | 198,84 | 35,44                             | 1,018 | 0,010 | 1,026 | 0,010 | 1,046 | 0,010 | 0,150  | 0,291 |   |
| ES-15  | 669247,48 | 4747104,72 | 29 | sandstone  | 224,6                                                         | 1,011 | 1,019 | 1,032 | 0,222  | 50,4      | 5,9         | 113,3          | 111,3            | 324,25 | 88,58                             | 1,011 | 0,006 | 1,019 | 0,011 | 1,032 | 0,011 | 0,222  | 0,437 |   |
| ES-15  | 669247,48 | 4747104,72 | 29 | sandstone  | 224,6                                                         | 1,011 | 1,019 | 1,032 | 0,222  | 24,0      | 5,9         | 53,9           | 170,7            | 324,25 | 88,58                             | 1,011 | 0,006 | 1,019 | 0,011 | 1,032 | 0,011 | 0,222  | 0,437 |   |
| ES-16  | 670382,54 | 4748501,77 | 16 | e-level    | 313,4                                                         | 1,013 | 1,020 | 1,034 | 0,151  | 33,4      | 10,3        | 104,7          | 208,7            | 252,77 | 42,92                             | 1,013 | 0,007 | 1,020 | 0,015 | 1,034 | 0,014 | 0,151  | 0,434 |   |
| ES-17  | 670903,75 | 4748805,63 | 20 | sandstone  | 292,3                                                         | 1,013 | 1,035 | 1,050 | 0,415  | 23,8      | 7,2         | 69,6           | 222,7            | 228,69 | 52,76                             | 1,013 | 0,006 | 1,035 | 0,016 | 1,050 | 0,017 | 0,414  | 0,325 |   |
| ES-18  | 671777,84 | 4750192,46 | 31 | sandstone  | 232,4                                                         | 1,010 | 1,003 | 1,013 | -0,549 | 24,9      | 9,6         | 57,8           | 174,6            | 209,17 | 29,39                             | 1,010 | 0,003 | 1,003 | 0,002 | 1,013 | 0,004 | -0,549 | 0,238 |   |
| ES-19  | 672075,99 | 4751062,36 | 22 | sandstone  | 244,2                                                         | 1,010 | 1,043 | 1,058 | 0,613  | 69,7      | 6,3         | 170,2          | 74,0             | 195,50 | 39,12                             | 1,010 | 0,017 | 1,042 | 0,023 | 1,058 | 0,033 | 0,613  | 0,304 |   |
| ES-20  | 672385,99 | 4751756,33 | 16 | sandstone  | 15                                                            | 1,162 | 1,194 | 1,076 | 0,678  | 91,0      | 8,4         | 13,7           | 1,3              | 174,78 | 64,96                             | 1,009 | 0,011 | 1,055 | 0,032 | 1,069 | 0,037 | 0,678  | 0,275 |   |
| ES-21  | 672517,04 | 4752387,15 | 23 | sandstone  | 160,2                                                         | 1,011 | 1,016 | 1,028 | 0,089  | 20,0      | 7,1         | 32,0           | 128,2            | 184,65 | 49,95                             | 1,011 | 0,004 | 1,016 | 0,014 | 1,028 | 0,015 | 0,089  | 0,391 |   |
| ES-22  | 672550,03 | 4752417,2  | 21 | sandstone  | 255,9                                                         | 1,017 | 1,029 | 1,048 | 0,236  | 52,0      | 1,3         | 133,0          | 122,9            | 236,46 | 31,54                             | 1,017 | 0,006 | 1,029 | 0,012 | 1,048 | 0,014 | 0,236  | 0,240 |   |
| ES-23  | 672943,13 | 4752875,15 | 24 | e-level    | 241,8                                                         | 1,010 | 1,074 | 1,093 | 0,747  | 63,9      | 9,6         | 154,5          | 87,3             | 271,69 | 39,65                             | 1,010 | 0,005 | 1,074 | 0,019 | 1,092 | 0,019 | 0,747  | 0,150 |   |
| ES-26  | 663380,84 | 4725928,67 | 23 | e-level    | 156,6                                                         | 1,012 | 1,030 | 1,043 | 0,375  | 66,6      | 2,8         | 104,2          | 52,4             | 157,34 | 17,04                             | 1,011 | 0,003 | 1,030 | 0,012 | 1,043 | 0     |        |       |   |
